# Supplementary material for: Synthesis of sulfonic acid-containing POSS and its filler effects for enhancing thermal stabilities and lowering melting temperatures of ionic liquids
Source: Royal Society of Chemistry journal article supplement (doi:10.1039/c3ta14039c), 2013-12-02
Supplement: c3ta14039c.pdf [file c3ta14039c.pdf]

## Supporting Information

### **Synthesis of Sulfonic Acid-Containing POSS and Its Filler Effects for Enhancing Thermal Stabilities and Lowering Melting Temperatures of Ionic Liquids**

Jong-Hwan, Jeon, Kazuo Tanaka, Yoshiki Chujo\*

Department of Polymer Chemistry, Graduate School of Engineering, Kyoto University, Katsura, Nishikyo-ku, Kyoto 615-8510, Japan

Phone: +81-75-383-2604

Fax: +81-75-383-2605

\*To whom correspondence should be addressed: [chujo@chujo.synchem.kyoto-u.ac.jp](mailto:chujo@chujo.synchem.kyoto-u.ac.jp)

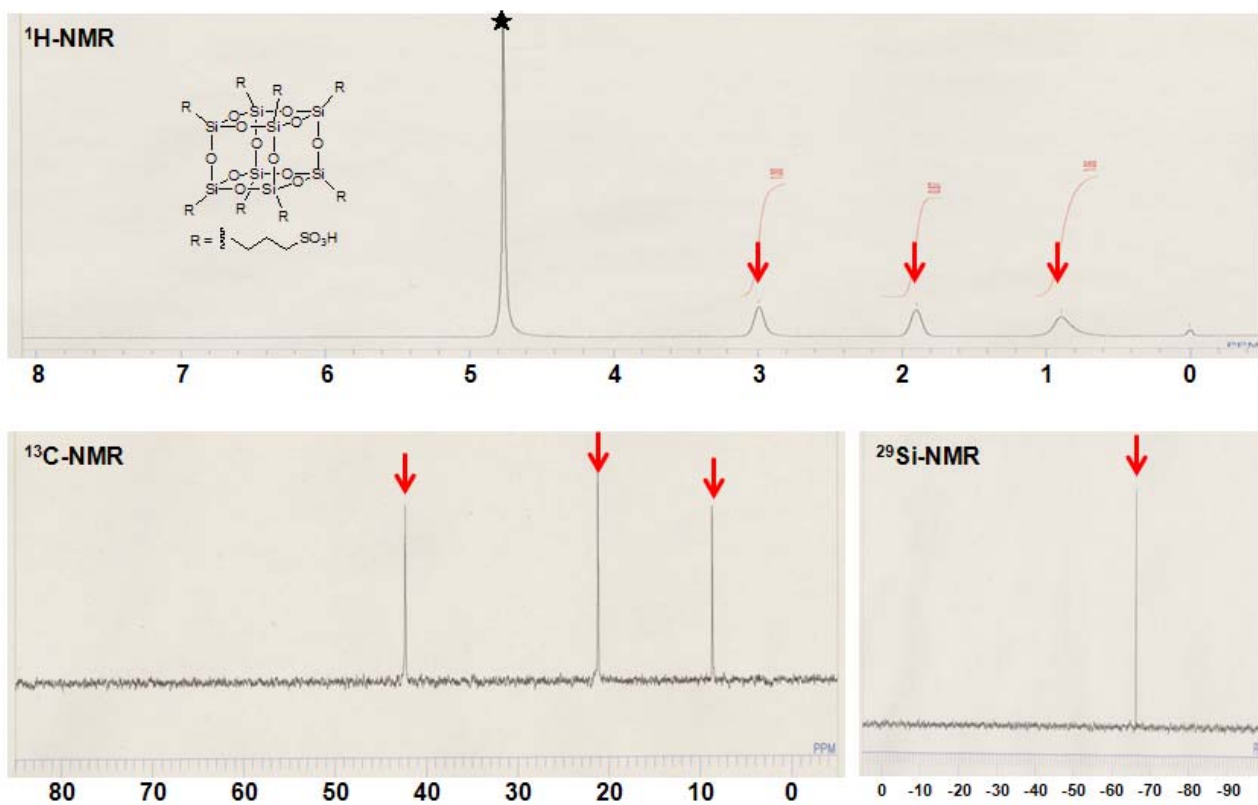

**Figure S1.** NMR spectra of POSS-[SO<sub>3</sub>H]<sub>8</sub> in D<sub>2</sub>O.

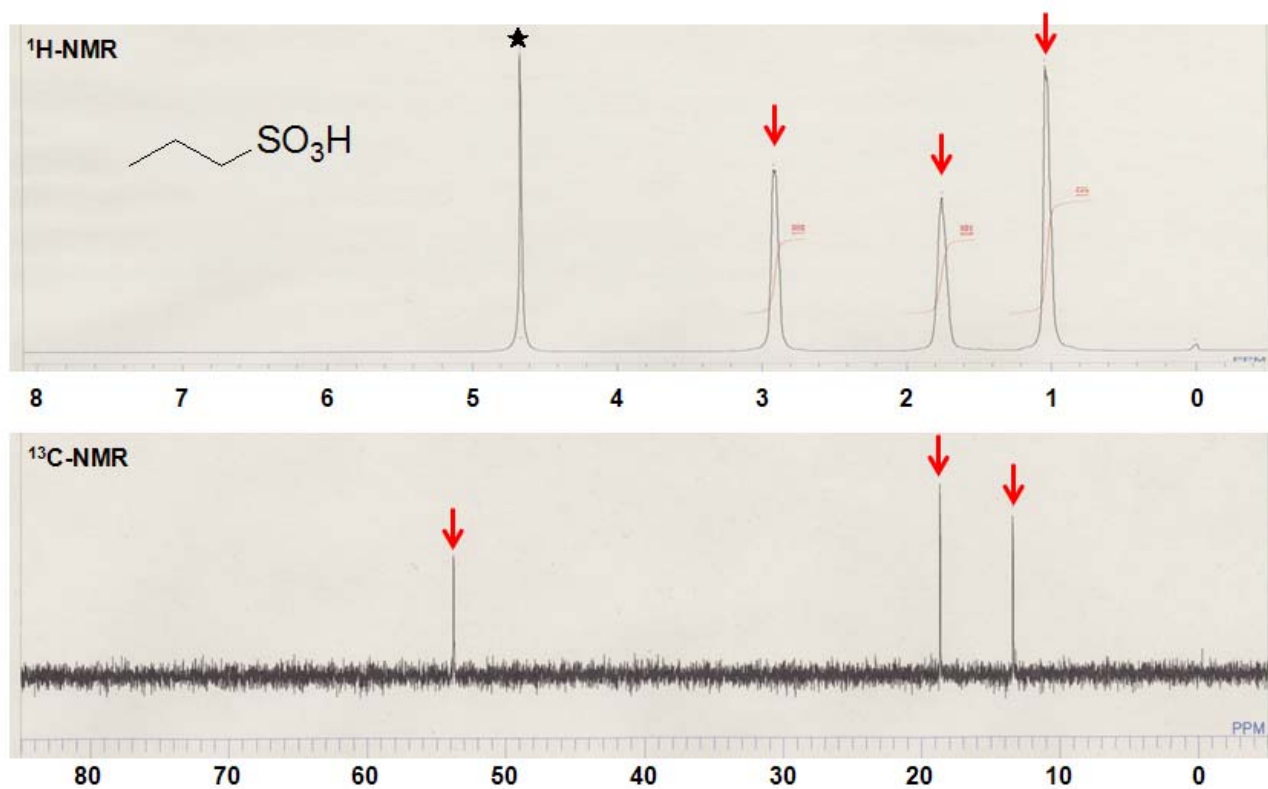

**Figure S2.** NMR spectra of Arm-SO<sub>3</sub>H in D<sub>2</sub>O.

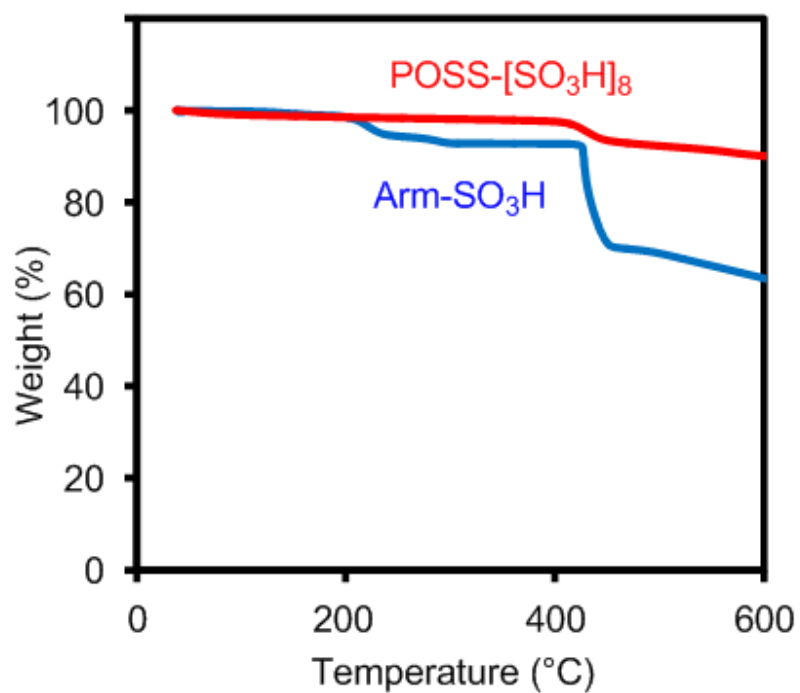

**Figure S3.** TGA profiles of POSS-[SO<sub>3</sub>H]<sub>8</sub> and Arm-SO<sub>3</sub>H.
